# Supplementary material for: Highly dispersed ruthenium nanoparticles on nitrogen doped carbon toward efficient hydrogen evolution in both alkaline and acidic electrolytes
Source: Royal Society of Chemistry journal article supplement (doi:10.1039/d2ra02671f), 2022-01-01
Supplement: d2ra02671f1.pdf [file d2ra02671f1.pdf]

## Supporting Information

### Highly dispersed ruthenium nanoparticles on nitrogen doped carbon toward efficient hydrogen evolution in both alkaline and acidic electrolytes

Gen Li<sup>a</sup>, Rui Gao<sup>a</sup>, Zhongyu Qiu<sup>a</sup>, Wei Liu<sup>a</sup> and Yujiang Song<sup>\*a</sup>

<sup>a</sup>: State Key Laboratory of Fine Chemicals, School of Chemical Engineering, Dalian University of Technology, 2  
Linggong Road, Dalian 116024, China.

Corresponding author

\* E-mail: yjsong@dlut.edu.cn

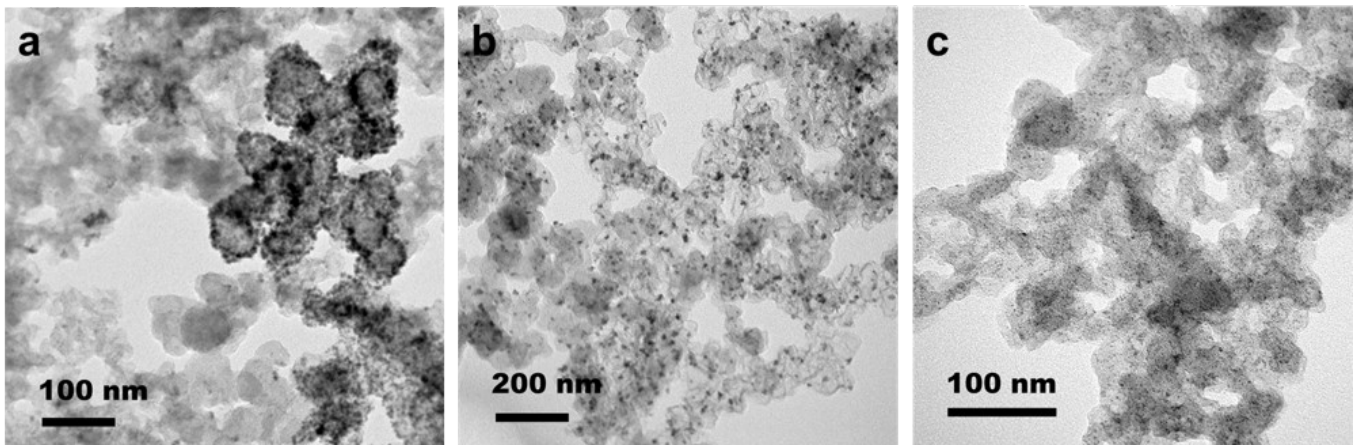

**Fig. S1** TEM images of samples: (a) Carbon supported Ru NPs synthesized with sodium borohydride as reducing agent in water (Ru/C-NaBH<sub>4</sub>); (b) Carbon supported Ru NPs synthesized with EG as reducing agent in EG (Ru/C-EG); (c) Carbon supported Ru NPs synthesized with EG as reducing agent in the presence of PVP as capping agent (PVP-Ru/C).

Fig. S1 give the understanding of the origin of highly dispersed ultrafine Ru NPs. EG has an appropriate reducing capacity and can well disperse EC600. Compared with Ru/C-NaBH<sub>4</sub>, the particles of Ru/C-EG have significantly improved the distribution (Fig. S1 a, b). This results show that EG as a reducing agent can effectively promote the dispersion of Ru particles on the carrier. In addition, PVP, as a nitrogen-containing capping agent, can cover the surface of nanocrystalline during nucleation and growth process, and plays an important role in the formation of the nanocrystalline<sup>1</sup>. Thus, the introduction of PVP in EG system significantly inhibits the agglomeration of Ru, and ultrafine Ru nanoparticles were obtained while maintaining a highly dispersed state (Fig. S1 c).

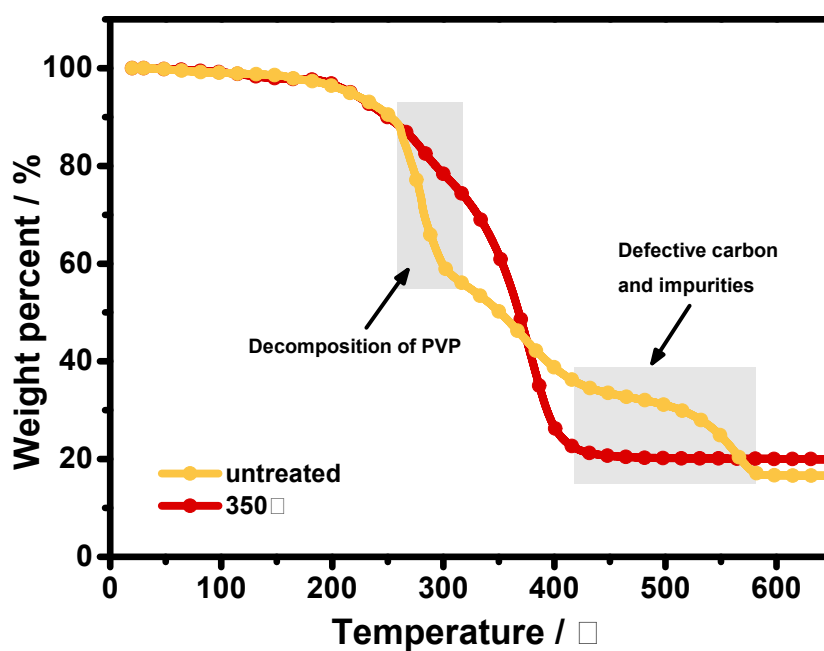

Fig. S2 TGA of carbon loaded Ru with adsorbed PVP before and after pyrolysis.

The N element of Ru/N-C comes from the pyrolysis of PVP. There exists an obvious weight loss stage from 250 to 350°C representing the thermal decomposition of adsorbed PVP. The weight loss between 420~550°C can be ascribed to the loss of amorphous carbon and impurities. After pyrolysis at 350°C, these two weight loss segments disappeared, indicating that adsorbed PVP has been well pyrolyzed.

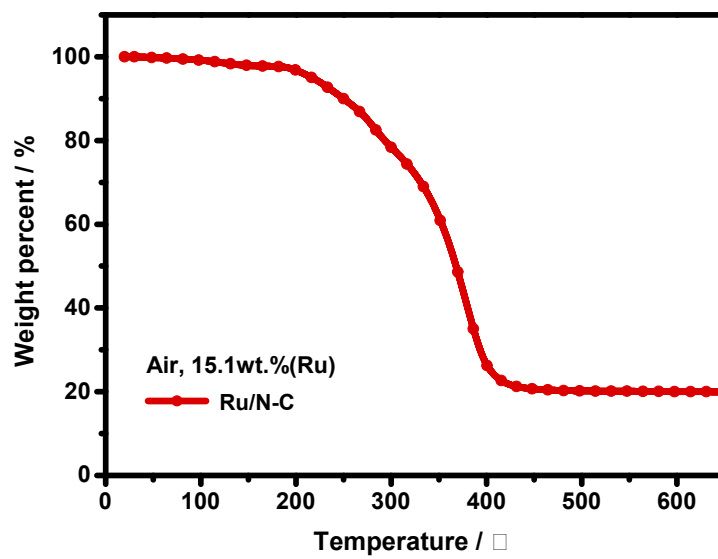

**Fig. S3** TGA curve of Ru/N-C recorded in dry air with a heating rate of  $10^{\circ}\text{C min}^{-1}$

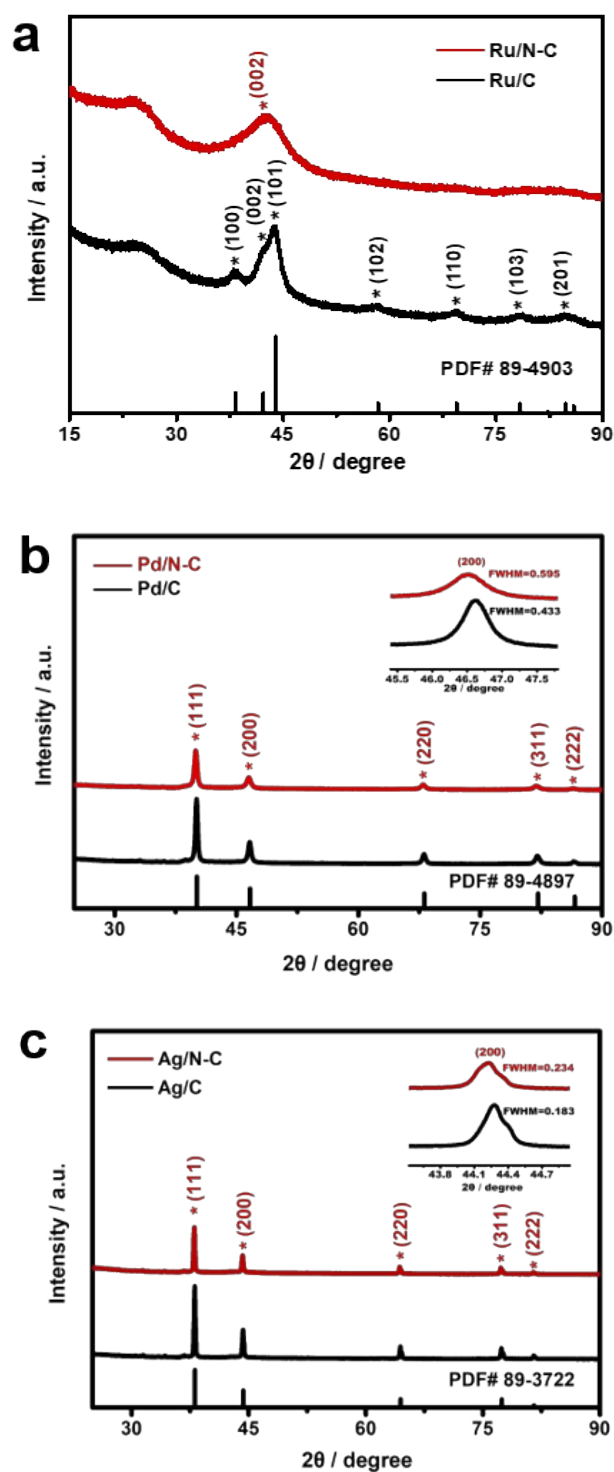

**Fig. S4** (a) XRD patterns of Ru/N-C and Ru/C; (b) XRD patterns of Pd/N-C and Pd/C; (c) XRD patterns of Ag/N-C and Ag/C. Insets: enlarged (002) of Pd/C, Pd/N-C, Ag/C, and Ag/N-C.

Pd and Ag have faster reaction kinetics and different nucleation and growth habits from Ru, and it is more difficult to control the size. According to full width at half maximum (FWHM) before and after nitrogen doping, the particle size of Pd/N-C and Ag/N-C has also become smaller. This indicates that the synthetic strategy is general for particle size control.

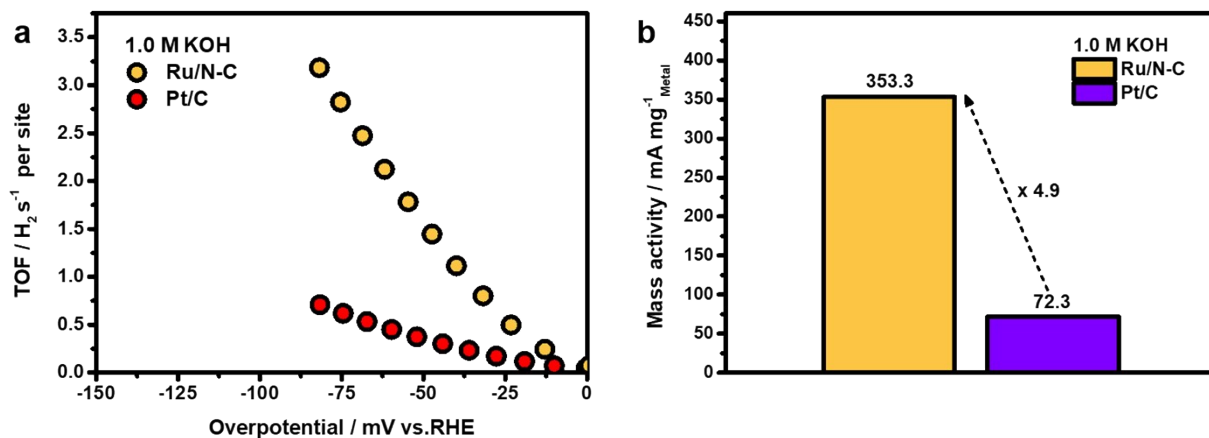

**Fig. S5** (a) TOF of Ru/N-C and commercial Pt/C; (b) Mass activity of Ru/N-C and commercial Pt/C at the overpotential of 10 mV in  $\text{N}_2$ -saturated 1.0 M KOH aqueous solution.

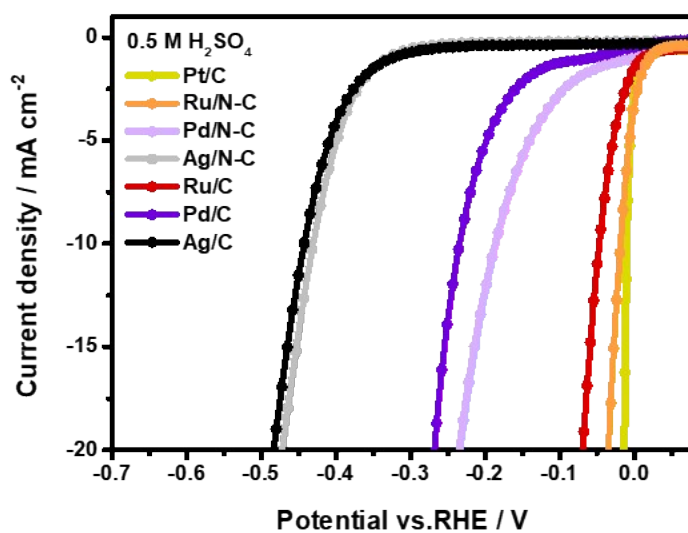

**Fig. S6** Polarization curves of the electrocatalysts recorded in  $\text{N}_2$ -saturated 0.5 M  $\text{H}_2\text{SO}_4$  aqueous solution with a scan rate of  $5 \text{ mV s}^{-1}$ .

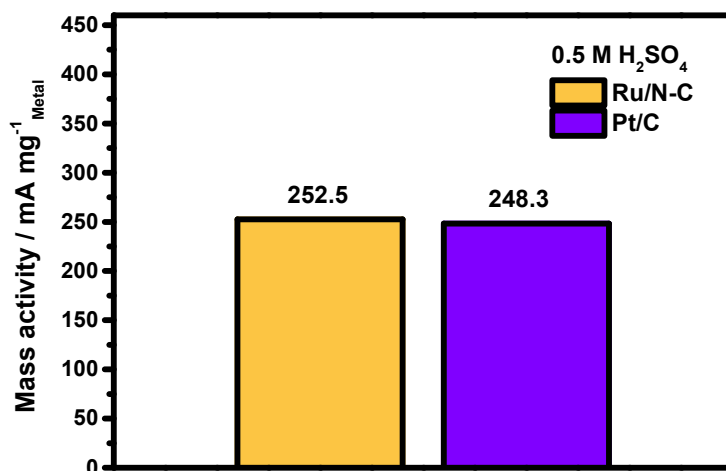

**Fig. S7** Mass activity of Ru/N-C and Pt/C at the overpotential of 10 mV in N<sub>2</sub>-saturated 0.5 M H<sub>2</sub>SO<sub>4</sub> aqueous solution.

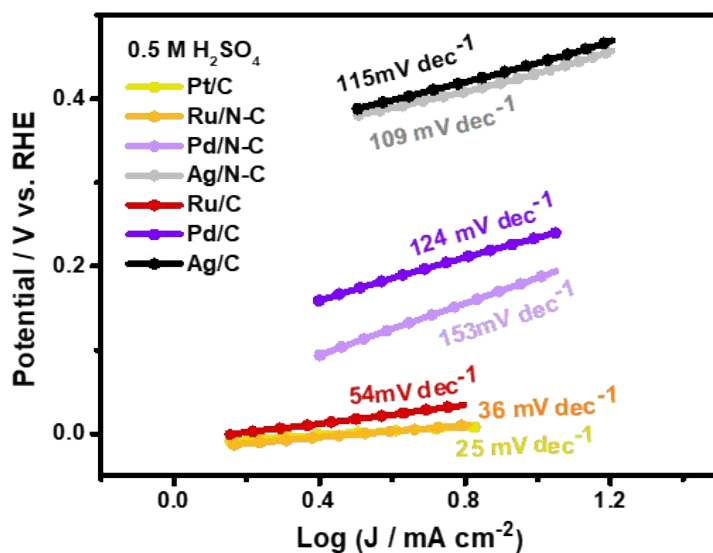

**Fig. S8** Tafel plots of the electrocatalysts collected in N<sub>2</sub>-saturated 0.5 M aqueous H<sub>2</sub>SO<sub>4</sub> solution.



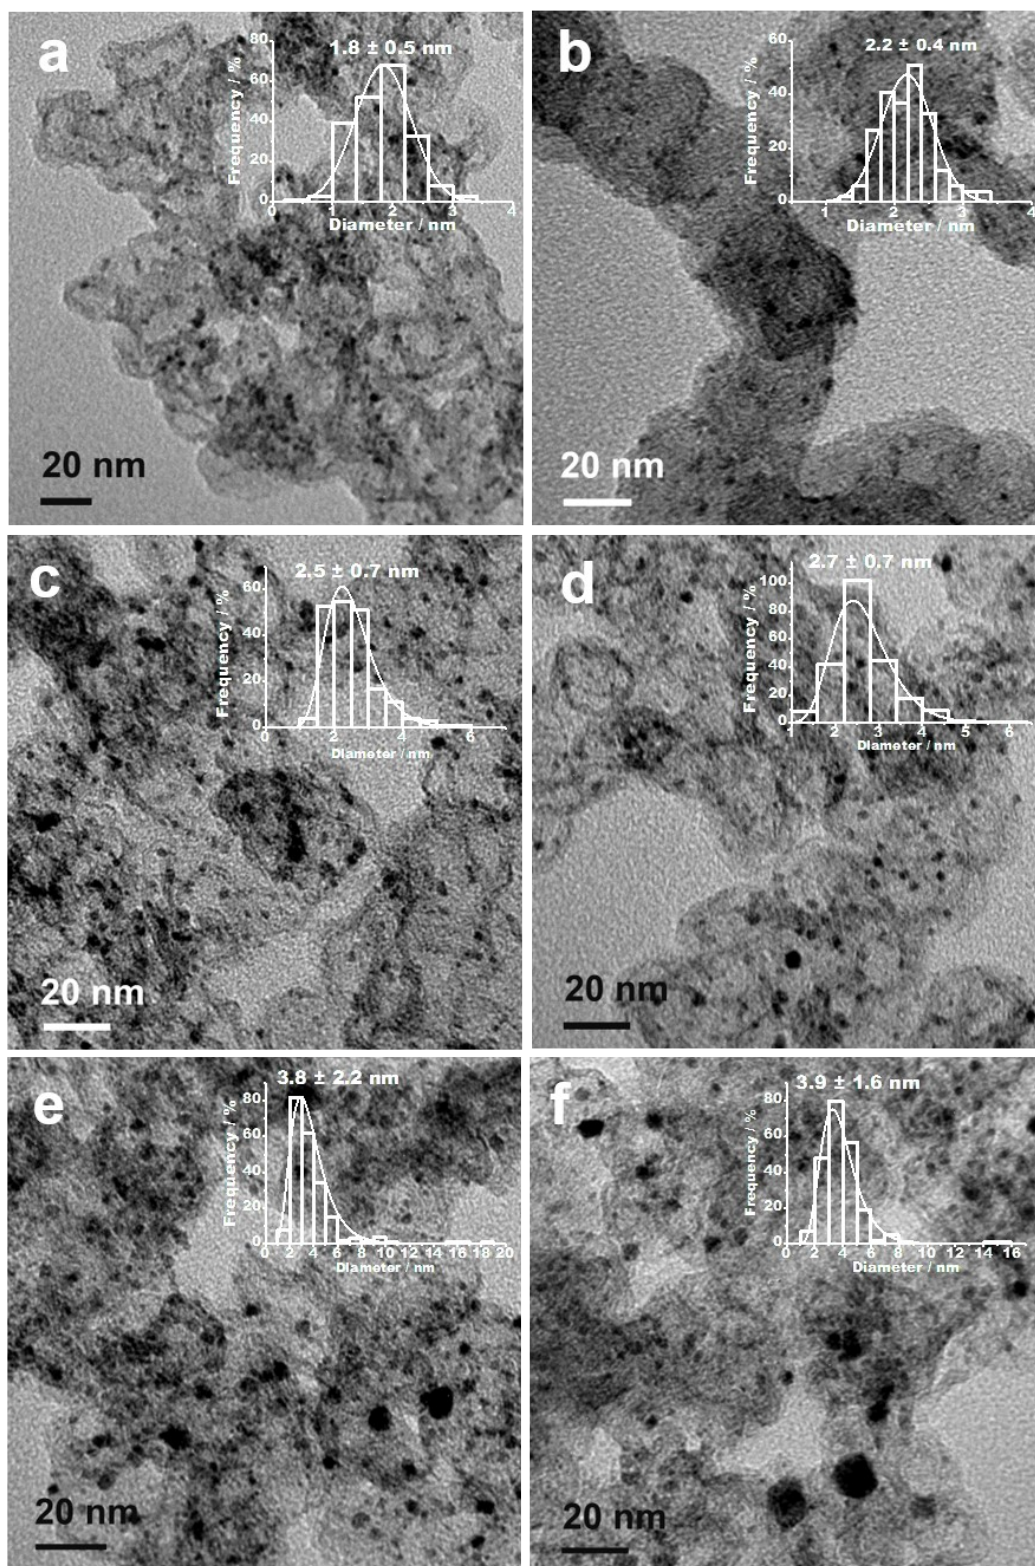

**Fig. S9** TEM images of Ru/N-C synthesized at different temperature. (a) 250°C; (b) 350°C; (c) 450°C; (d) 550°C; (e) 650°C; (f) 750°C. Inset: size distribution plotted by manually measuring at least 200 individual nanoparticles.



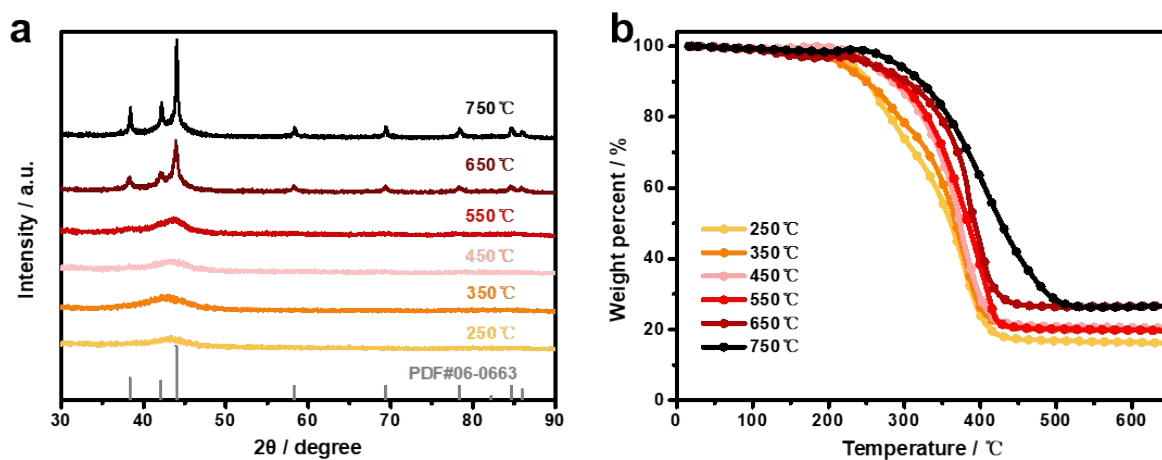

**Fig. S10** (a) XRD patterns of a series of Ru/N-C obtained at different temperatures; (b) TGA curves of a series of Ru/N-C obtained at different temperatures.

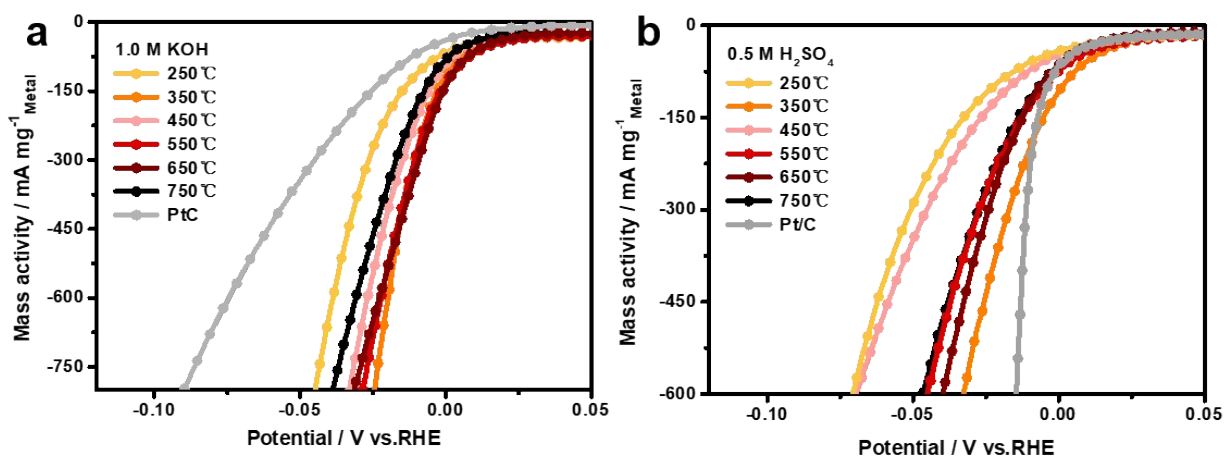

**Fig. S11** Mass-normalized HER polarization curves of a series of Ru/N-C synthesized at different temperatures in 1.0 M KOH (a) and 0.5 M H<sub>2</sub>SO<sub>4</sub> aqueous solution (b).

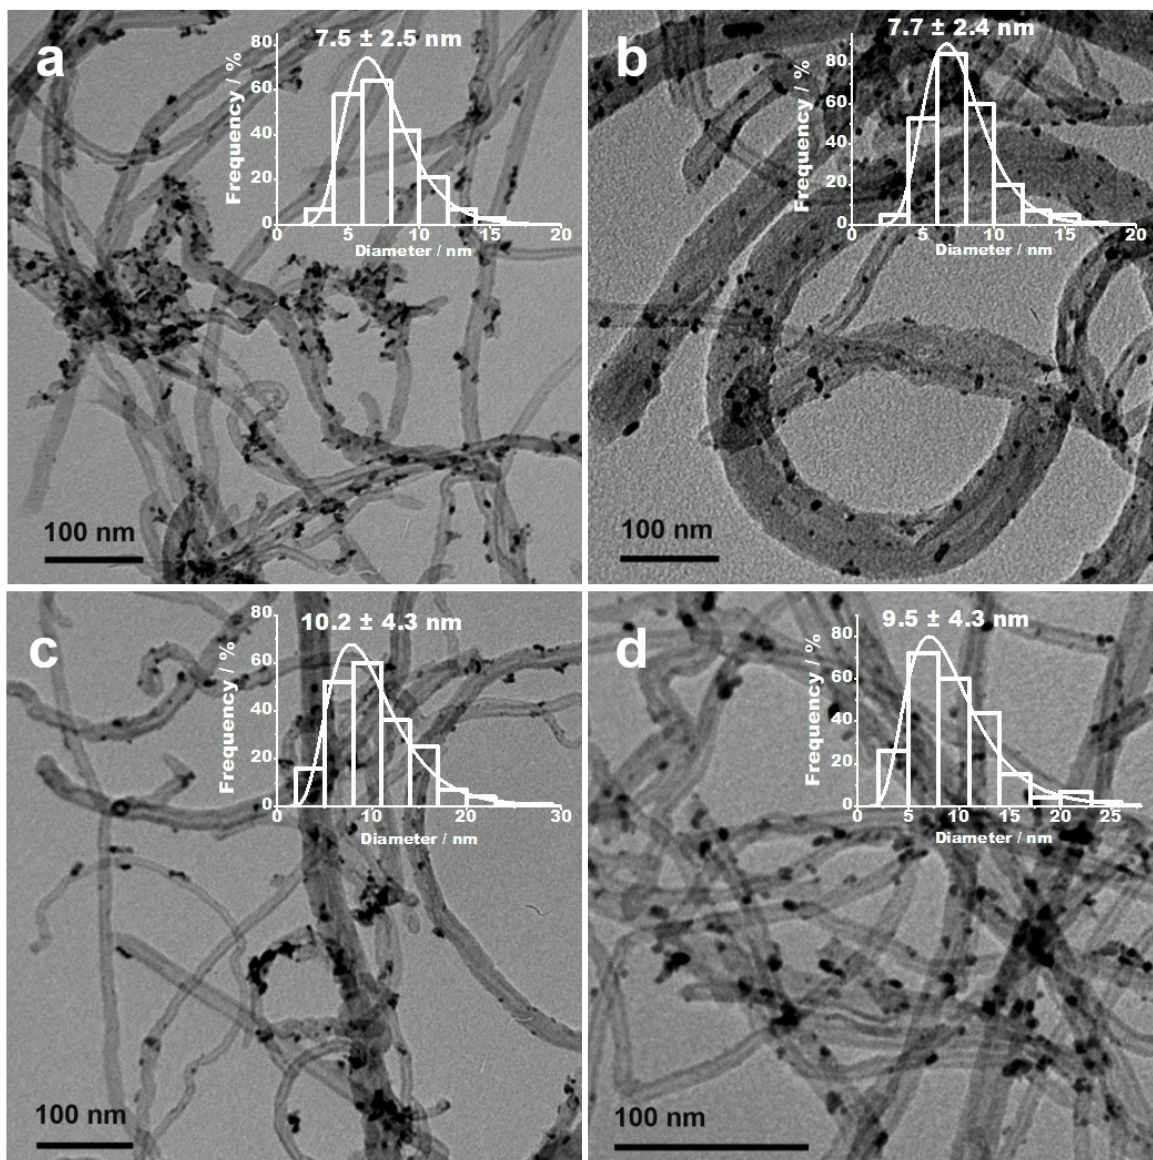

**Fig. S12** TEM images of Ru NPs loaded on different N doped carriers. (a) short carboxyl multi-walled carbon nanotubes (Short MWCNT-COOH); (b) short hydroxyl multi-walled carbon nanotubes (Short MWCNT-OH); (c) hydroxyl multi-walled carbon nanotubes (MWCNT-OH); (d) multi-walled carbon nanotubes (MWCNT). Inset: size distribution plotted by manually measuring at least 200 individual nanoparticles.

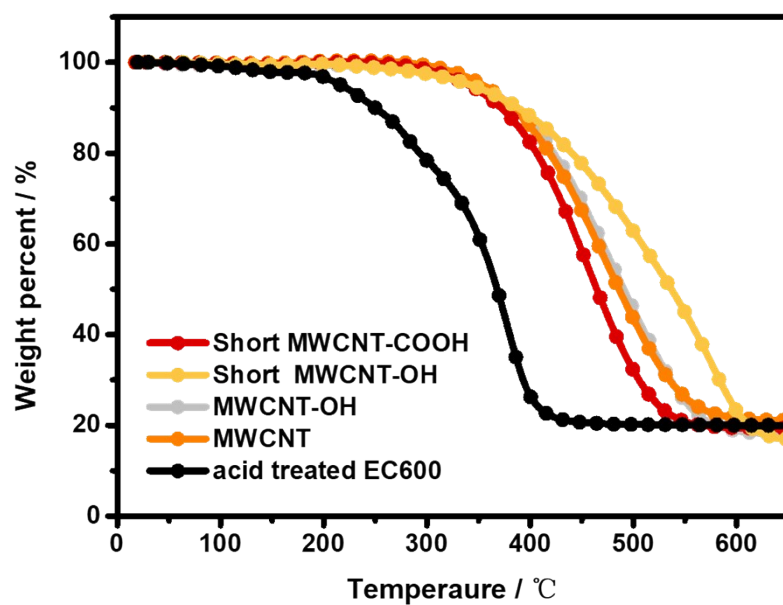

Fig. S13 TGA curves of Ru NPs loaded on N doped different carriers.

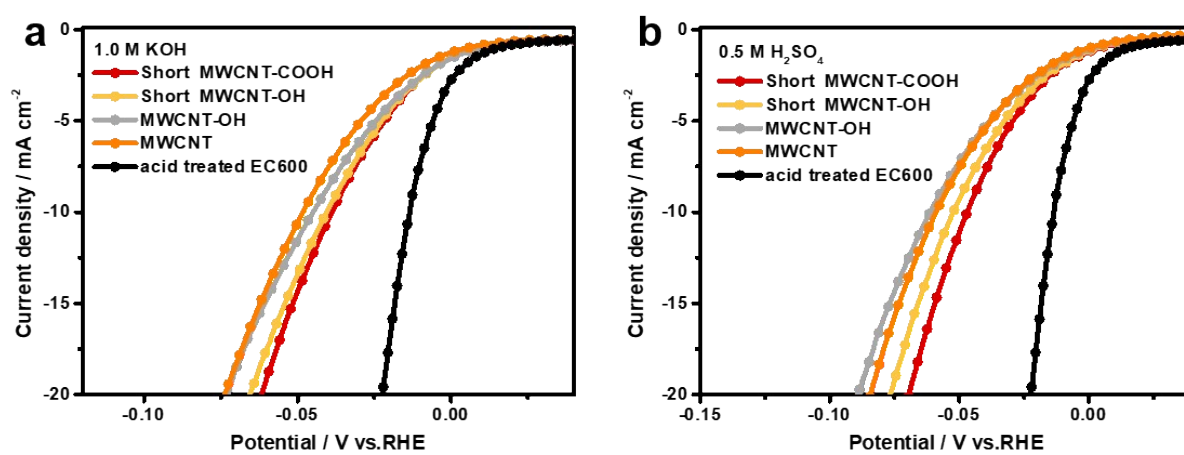

Fig. S14 HER polarization curves of Ru NPs loaded on N doped different carriers including Short MWCNT-COOH, Short MWCNT-OH, MWCNT-OH, MWCNT and EC600 in 1.0 M KOH (a) and 0.5 M H<sub>2</sub>SO<sub>4</sub> (b) aqueous solution.

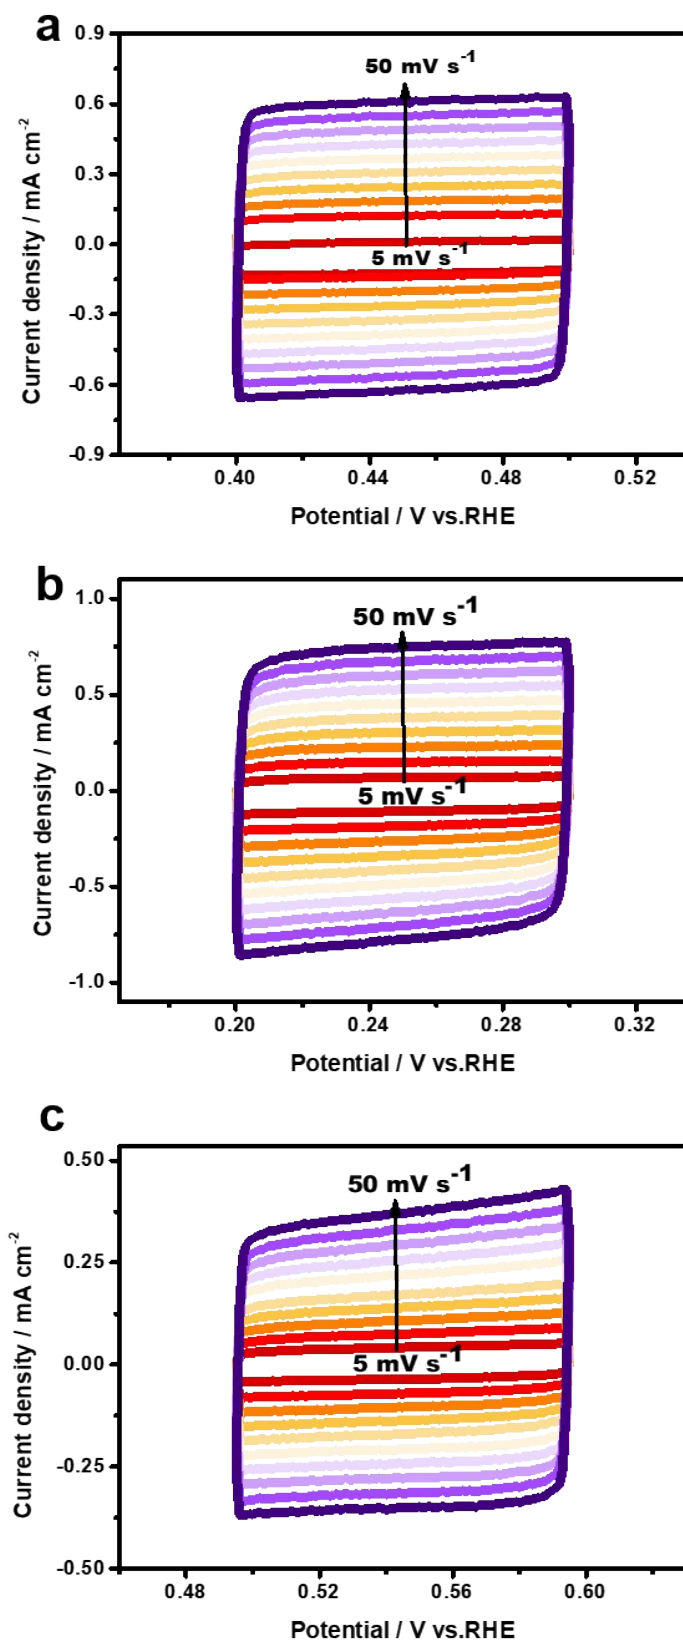

**Fig. S15** CV curves measured at non-Faraday region with a scan rate from 5 to 50 mV s<sup>-1</sup> for Pd/N-C (a), Ag/N-C (b), and commercial Pt/C (c).



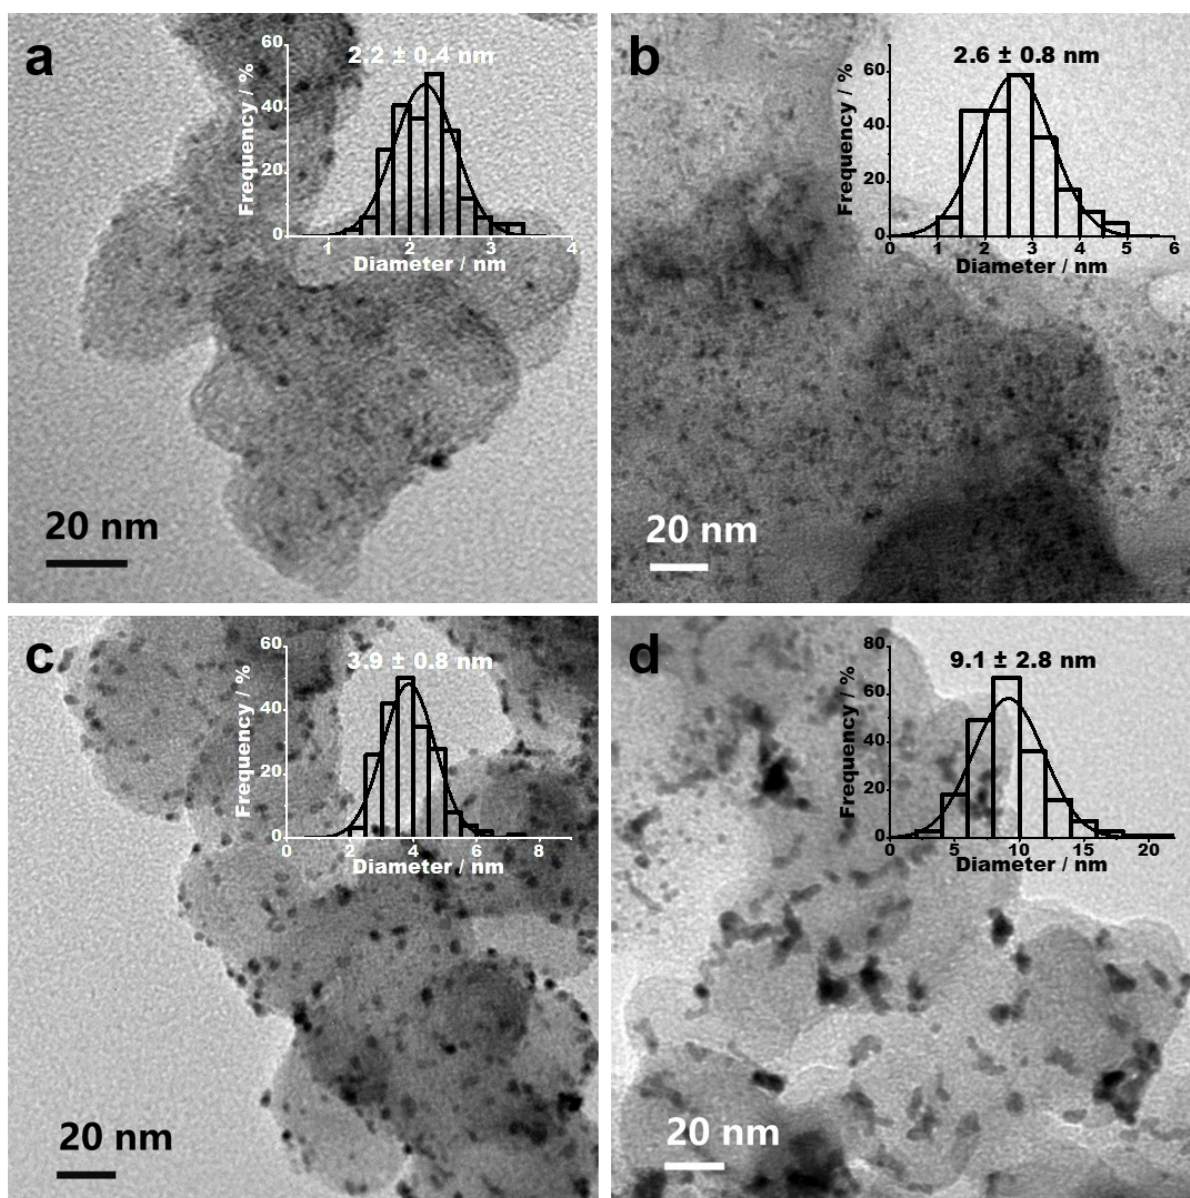

**Fig. S16** TEM images of Ru/N-C initially (a) and after (b) 10000 times of potential cycles; TEM images of commercial Pt/C initially (c) and after (d) 10000 times of potential cycles in 1.0 M KOH aqueous solution. Insets: corresponding size distribution plotted by manually measuring at least 200 individual nanoparticles.

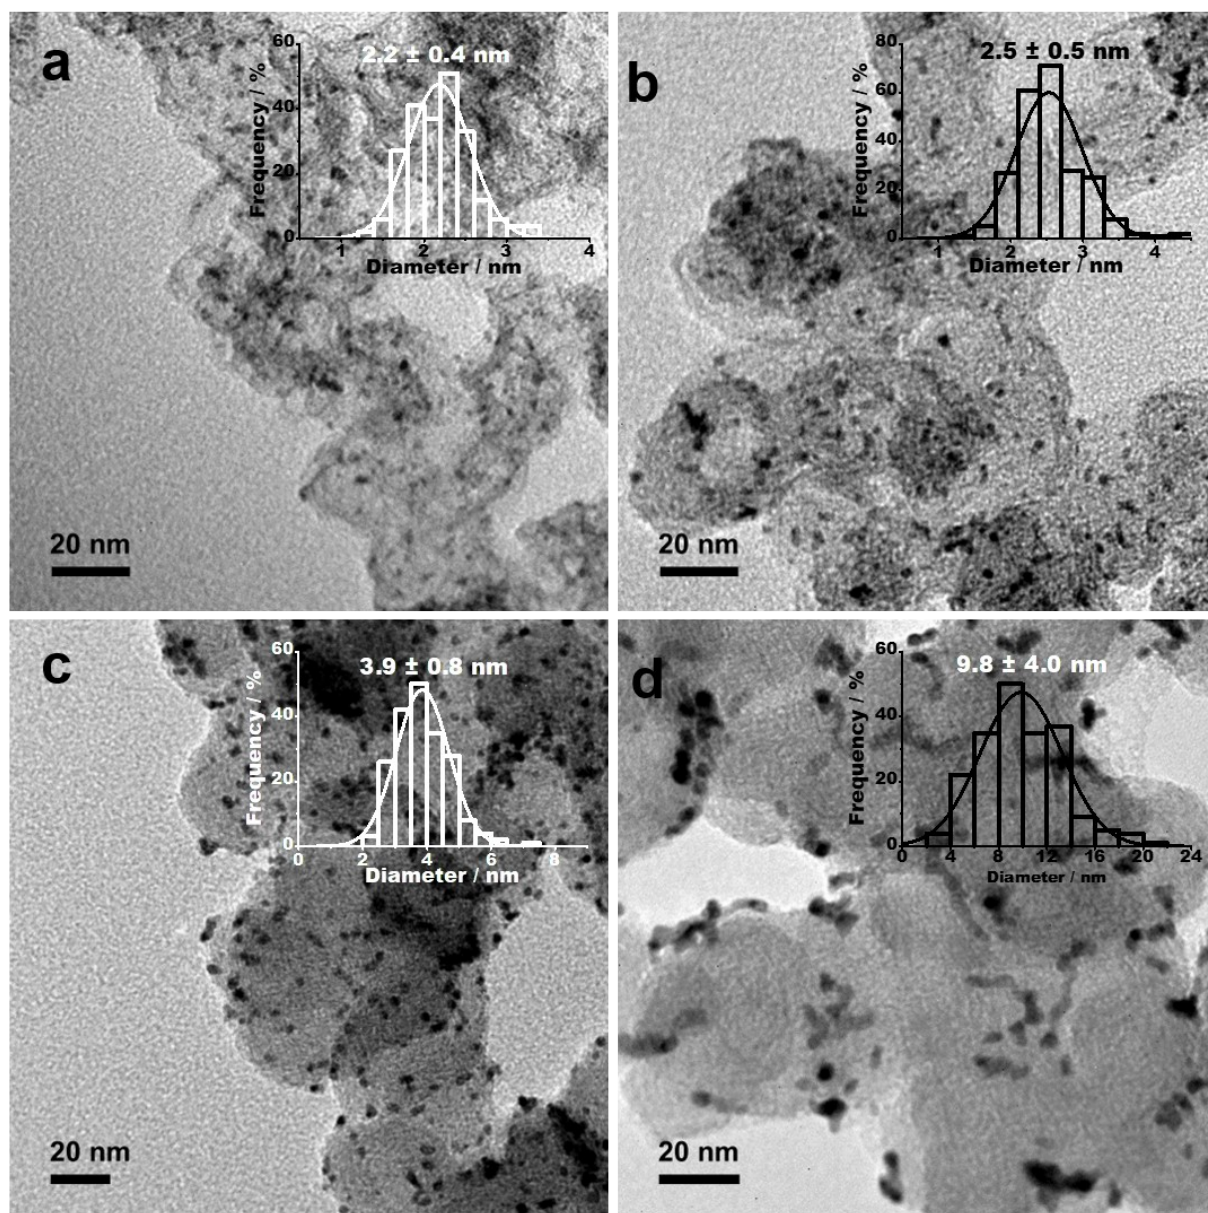

**Fig. S17** TEM images of Ru/N-C before (a) and after (b) 12 h of chronopotentiometry test; TEM images of commercial Pt/C before (c) and after (d) 12 h of chronopotentiometry test at a constant cathodic current density of  $10 \text{ mA cm}^{-2}$  in  $1.0 \text{ M KOH}$  aqueous solution. Insets: corresponding size distribution plotted by measuring at least 200 individual nanoparticles.



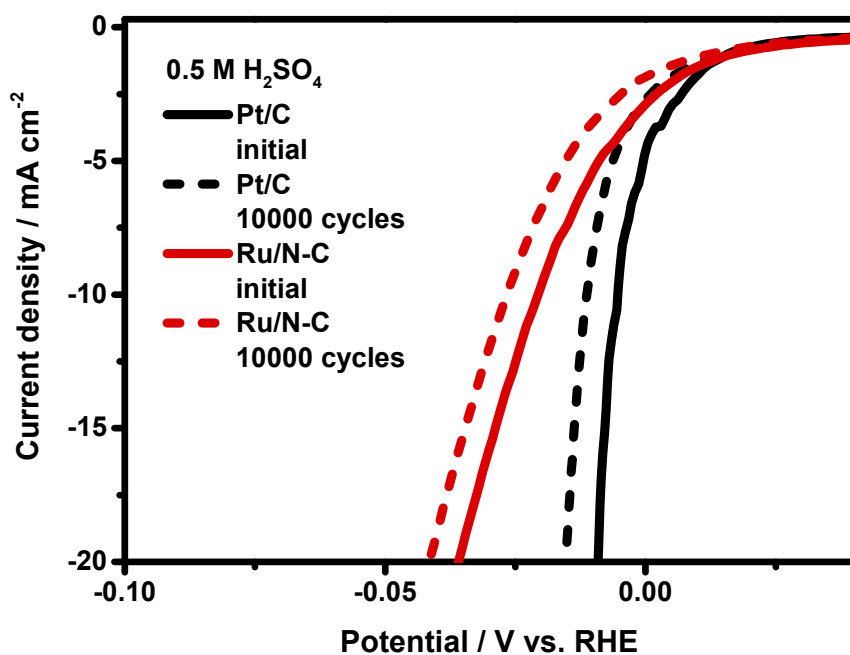

**Fig. S18** HER polarization curves of Ru/N-C and commercial Pt/C before and after 10000 times of potential cycles in 0.5 M H<sub>2</sub>SO<sub>4</sub> aqueous solution.

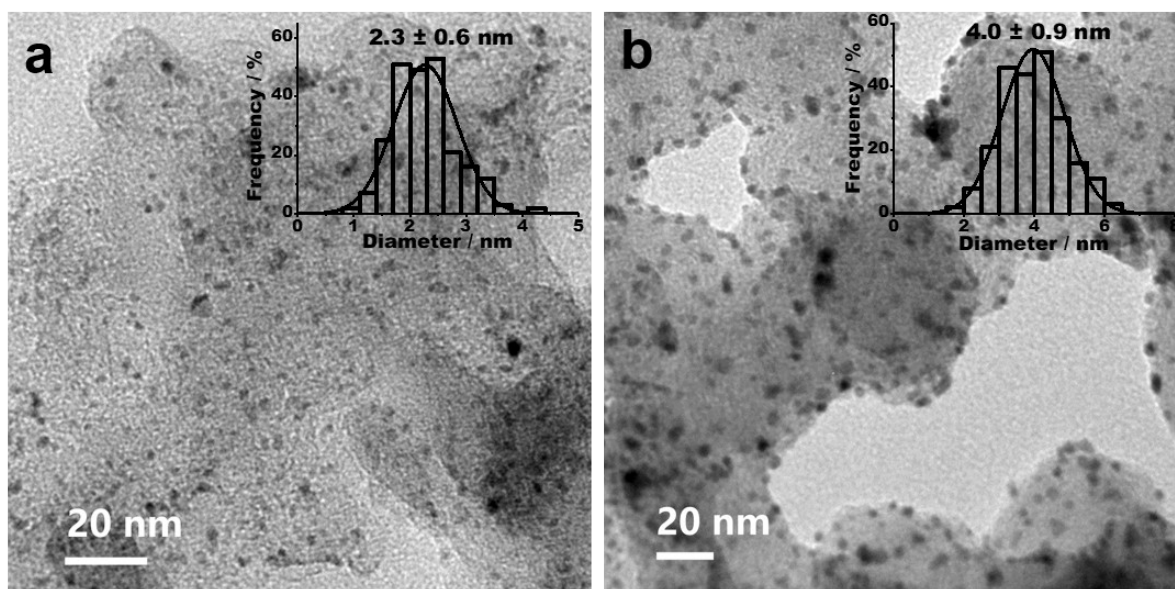

**Fig. S19** TEM images of Ru/N-C (a) and commercial Pt/C (b) after 10000 times of potential cycles in 0.5 M H<sub>2</sub>SO<sub>4</sub> aqueous solution. Insets: corresponding size distribution plotted by manually measuring at least 200 individual nanoparticles.



**Table. S1** Elemental content of Ru/N-C according to XPS

| Element              | Ru   | N    | C     | O    |
|----------------------|------|------|-------|------|
| Atomic percent / at% | 0.81 | 1.41 | 93.29 | 4.49 |

**Table S2** HER activity of noble metal based electrocatalysts in acidic electrolytes

| Catalyst                   | Catalyst Loading           | Electrolyte                          | Overpotential (mV) | Current Density (mA cm <sup>-2</sup> ) | Ref.      |
|----------------------------|----------------------------|--------------------------------------|--------------------|----------------------------------------|-----------|
| Ru/N-C                     | 0.2 mg cm <sup>-2</sup>    | 0.5 M H <sub>2</sub> SO <sub>4</sub> | 18.5               | 10                                     | This Work |
| RuCoP                      | 0.3 mg cm <sup>-2</sup>    | 0.5 M H <sub>2</sub> SO <sub>4</sub> | 11                 | 10                                     | 2         |
| Ru@MWCNT                   | 0.7 mg cm <sup>-2</sup>    | 0.5 M H <sub>2</sub> SO <sub>4</sub> | 13                 | 10                                     | 3         |
| Ru@C <sub>2</sub> N        | 0.285 mg cm <sup>-2</sup>  | 0.5 M H <sub>2</sub> SO <sub>4</sub> | 13.5               | 10                                     | 4         |
| Ru <sub>2</sub> P@PNC@CC   | ----                       | 0.5 M H <sub>2</sub> SO <sub>4</sub> | 15                 | 10                                     | 5         |
| L-RP/C                     | 0.464 mg cm <sup>-2</sup>  | 0.5 M H <sub>2</sub> SO <sub>4</sub> | 19                 | 10                                     | 6         |
| RuCu NSs/C                 | ----                       | 0.5 M H <sub>2</sub> SO <sub>4</sub> | 19                 | 10                                     | 7         |
| Ru SAs/PN                  | 1.0 mg cm <sup>-2</sup>    | 0.5 M H <sub>2</sub> SO <sub>4</sub> | 24                 | 10                                     | 8         |
| Ru@NGC                     | 0.36 mg cm <sup>-2</sup>   | 0.5 M H <sub>2</sub> SO <sub>4</sub> | 25                 | 10                                     | 9         |
| RuNC                       | 0.25 mg cm <sup>-2</sup>   | 0.5 M H <sub>2</sub> SO <sub>4</sub> | 29                 | 10                                     | 10        |
| RuSx/S-GO                  | 1 mg cm <sup>-2</sup>      | 0.5 M H <sub>2</sub> SO <sub>4</sub> | 31                 | 10                                     | 11        |
| CoRu@NC                    | 0.273 mg cm <sup>-2</sup>  | 0.5 M H <sub>2</sub> SO <sub>4</sub> | 32                 | 10                                     | 12        |
| Ag                         | 0.2 mg cm <sup>-2</sup>    | 0.5 M H <sub>2</sub> SO <sub>4</sub> | 32                 | 10                                     | 13        |
| Ru@GLC                     | 0.4 mg cm <sup>-2</sup>    | 0.5 M H <sub>2</sub> SO <sub>4</sub> | 35                 | 10                                     | 14        |
| RuP <sub>2</sub> @NPC      | 1 mg cm <sup>-2</sup>      | 0.5 M H <sub>2</sub> SO <sub>4</sub> | 38                 | 10                                     | 15        |
| RuO/CeO <sub>2</sub>       | 0.197 mg cm <sup>-2</sup>  | 0.5 M H <sub>2</sub> SO <sub>4</sub> | 41                 | 10                                     | 16        |
| Ni-MOF@Pt                  | 0.2 mg cm <sup>-2</sup>    | 0.5 M H <sub>2</sub> SO <sub>4</sub> | 43                 | 10                                     | 17        |
| RuP-475                    | 0.345 mg cm <sup>-2</sup>  | 0.5 M H <sub>2</sub> SO <sub>4</sub> | 46                 | 10                                     | 18        |
| Ru-CoP/CDs                 | 0.42 mg cm <sup>-2</sup>   | 0.5 M H <sub>2</sub> SO <sub>4</sub> | 49                 | 10                                     | 19        |
| RuCo@CDs                   | 0.905 mg·cm <sup>-2</sup>  | 0.5 M H <sub>2</sub> SO <sub>4</sub> | 51                 | 10                                     | 20        |
| Ru@NG                      | 0.283 mg·cm <sup>-2</sup>  | 0.5 M H <sub>2</sub> SO <sub>4</sub> | 53                 | 10                                     | 21        |
| Ru-MoO <sub>2</sub>        | 0.285 mg·cm <sup>-2</sup>  | 0.5 M H <sub>2</sub> SO <sub>4</sub> | 55                 | 10                                     | 22        |
| N-RuP/NPC                  | 0.4 mg·cm <sup>-2</sup>    | 0.5 M H <sub>2</sub> SO <sub>4</sub> | 58.9               | 10                                     | 23        |
| RuNC-2                     | 0.86 mg·cm <sup>-2</sup>   | 0.5 M H <sub>2</sub> SO <sub>4</sub> | 61                 | 10                                     | 24        |
| Ru-HPC                     | 0.2 mg·cm <sup>-2</sup>    | 0.5 M H <sub>2</sub> SO <sub>4</sub> | 61.6               | 10                                     | 25        |
| RuFeP/NC                   | 0.36 mg·cm <sup>-2</sup>   | 0.5 M H <sub>2</sub> SO <sub>4</sub> | 65.8               | 10                                     | 26        |
| Rh-MoS <sub>2</sub>        | 0.5 mg·cm <sup>-2</sup>    | 0.5 M H <sub>2</sub> SO <sub>4</sub> | 67                 | 10                                     | 27        |
| W+RuC+BP                   | 0.31 mg·cm <sup>-2</sup>   | 0.5 M H <sub>2</sub> SO <sub>4</sub> | 80                 | 10                                     | 28        |
| Ru-MeOH-THF                | 0.35 mg·cm <sup>-2</sup>   | 0.5 M H <sub>2</sub> SO <sub>4</sub> | 83                 | 10                                     | 29        |
| RuO <sub>2</sub> -NWs@g-CN | 0.214 mg·cm <sup>-2</sup>  | 0.5 M H <sub>2</sub> SO <sub>4</sub> | 93                 | 10                                     | 30        |
| RuP <sub>2</sub> @NC       | 0.796 mg·cm <sup>-2</sup>  | 0.5 M H <sub>2</sub> SO <sub>4</sub> | 99                 | 10                                     | 31        |
| AgBr800                    | ----                       | 0.5 M H <sub>2</sub> SO <sub>4</sub> | 108                | 10                                     | 32        |
| Au/Ag HPNSs                | 0.212 mg cm <sup>-2</sup>  | 0.5 M H <sub>2</sub> SO <sub>4</sub> | 108                | 10                                     | 33        |
| RuP2-550                   | 0.345 mg cm <sup>-2</sup>  | 0.5 M H <sub>2</sub> SO <sub>4</sub> | 122                | 10                                     | 18        |
| Ru-MoSe <sub>2</sub>       | 0.53 mg·cm <sup>-2</sup>   | 0.5 M H <sub>2</sub> SO <sub>4</sub> | 143                | 10                                     | 34        |
| Pd@CWN                     | 3.8942 mg·cm <sup>-2</sup> | 0.5 M H <sub>2</sub> SO <sub>4</sub> | 154                | 10                                     | 35        |
| Ru-Si nanowires            | 0.257 mg·cm <sup>-2</sup>  | 0.5 M H <sub>2</sub> SO <sub>4</sub> | 200                | 10                                     | 36        |

**Table S3** HER activity of noble metal based electrocatalysts in alkaline electrolytes

| Catalyst                               | Catalyst Loading          | Electrolyte | Overpotential (mV) | Current Density (mA cm <sup>-2</sup> ) | Ref.      |
|----------------------------------------|---------------------------|-------------|--------------------|----------------------------------------|-----------|
| Ru/N-C                                 | 0.2 mg·cm <sup>-2</sup>   | 1 M KOH     | 13.5               | 10                                     | This Work |
| Ru@NG                                  | 0.857 mg cm <sup>-2</sup> | 1 M KOH     | 8                  | 10                                     | 37        |
| RuCo@CDs                               | 0.905 mg·cm <sup>-2</sup> | 1 M KOH     | 11                 | 10                                     | 20        |
| RuNi                                   | ----                      | 1 M KOH     | 15                 | 10                                     | 38        |
| Ru@C <sub>2</sub> N                    | 0.285 mg cm <sup>-2</sup> | 1 M KOH     | 17                 | 10                                     | 4         |
| Ru@WMCNT                               | 0.7 mg cm <sup>-2</sup>   | 1 M KOH     | 17                 | 10                                     | 3         |
| L-RP/C                                 | 0.464 mg cm <sup>-2</sup> | 1 M KOH     | 18                 | 10                                     | 6         |
| RuP-475                                | 0.345 mg cm <sup>-2</sup> | 1 M KOH     | 22                 | 10                                     | 18        |
| Ru-HPC                                 | 0.2 mg·cm <sup>-2</sup>   | 1 M KOH     | 22.7               | 10                                     | 25        |
| RuCoP                                  | 0.3 mg cm <sup>-2</sup>   | 1 M KOH     | 23                 | 10                                     | 2         |
| RuCo@NC                                | 0.275 mg cm <sup>-2</sup> | 1 M KOH     | 28                 | 10                                     | 39        |
| Ru-MoO <sub>2</sub>                    | 0.285 mg cm <sup>-2</sup> | 1 M KOH     | 29                 | 10                                     | 40        |
| RuCu NSs/C                             | ----                      | 1 M KOH     | 29                 | 10                                     | 7         |
| Ru2P-BM-C                              | 0.34 mg cm <sup>-2</sup>  | 1 M KOH     | 36                 | 10                                     | 41        |
| RuNC-3                                 | 0.7 mg cm <sup>-2</sup>   | 1 M KOH     | 38                 | 10                                     | 42        |
| RuNi NSs@C                             | 3 mg cm <sup>-2</sup>     | 1 M KOH     | 40                 | 10                                     | 43        |
| Ni <sub>43</sub> Ru <sub>57</sub>      | 0.28 mg cm <sup>-2</sup>  | 1 M KOH     | 41                 | 10                                     | 44        |
| Ru <sub>0.33</sub> Se@MoS <sub>2</sub> | 1 mg cm <sup>-2</sup>     | 1 M KOH     | 45                 | 10                                     | 45        |
| CoRu@NC                                | 0.273 mg cm <sup>-2</sup> | 1 M KOH     | 45                 | 10                                     | 12        |
| Ru2P@PNC@CC                            | ----                      | 1 M KOH     | 50                 | 10                                     | 46        |
| Ru-CoP/CDs                             | 0.42 mg cm <sup>-2</sup>  | 1 M KOH     | 51                 | 10                                     | 19        |
| RuP <sub>2</sub> @NPC                  | 1 mg cm <sup>-2</sup>     | 1 M KOH     | 52                 | 10                                     | 15        |
| CoRu@MoS <sub>2</sub>                  | 0.390 mg cm <sup>-2</sup> | 1 M KOH     | 52                 | 10                                     | 47        |
| Ni <sub>5</sub> P <sub>4</sub> -Ru     | 0.142 mg cm <sup>-2</sup> | 1 M KOH     | 54                 | 10                                     | 48        |
| Ru-CoO                                 | 0.2 mg cm <sup>-2</sup>   | 1 M KOH     | 55                 | 10                                     | 49        |
| Ru/rGO-V                               | 0.204 mg cm <sup>-2</sup> | 1 M KOH     | 59.7               | 10                                     | 50        |
| Rh-Rh <sub>2</sub> O <sub>3</sub>      | ----                      | 1 M KOH     | 63                 | 10                                     | 51        |
| 8.3%Rh-MoSe                            | 0.5 mg cm <sup>-2</sup>   | 1 M KOH     | 73                 | 10                                     | 52        |
| SARu-MoS <sub>2</sub>                  | 0.285 mg·cm <sup>-2</sup> | 1 M KOH     | 76                 | 10                                     | 53        |
| RuNC-2                                 | 0.86 mg·cm <sup>-2</sup>  | 1 M KOH     | 81                 | 10                                     | 24        |
| Ag-Ni <sub>3</sub> S <sub>2</sub>      | ----                      | 1 M KOH     | 89                 | 10                                     | 54        |
| S-RuP@NPSC                             | 0.357 mg·cm <sup>-2</sup> | 1 M KOH     | 92                 | 10                                     | 55        |
| RuO <sub>2</sub> -NWs@g-CN             | 0.214 mg·cm <sup>-2</sup> | 1 M KOH     | 95                 | 10                                     | 30        |
| RuP <sub>2</sub> @NC                   | 0.796 mg·cm <sup>-2</sup> | 1 M KOH     | 98                 | 10                                     | 31        |
| Ni-MOF@Pt                              | 0.2 mg cm <sup>-2</sup>   | 1 M KOH     | 102                | 10                                     | 17        |
| Ag@NC                                  | 14.15 mg cm <sup>-2</sup> | 1 M KOH     | 189                | 10                                     | 56        |

**Table. S4** Surface area of different commercial carbon supports (From product manufacturer data)

|                                                        |                                              |                                              |                                        |                               |       |
|--------------------------------------------------------|----------------------------------------------|----------------------------------------------|----------------------------------------|-------------------------------|-------|
| Carbon support                                         | short hydroxyl multi-walled carbon nanotubes | short carboxyl multi-walled carbon nanotubes | hydroxyl multi-walled carbon nanotubes | multi-walled carbon nanotubes | EC600 |
| Specific Surface Area / m <sup>2</sup> g <sup>-1</sup> | >170                                         | >160                                         | >233                                   | >140                          | 1270  |

**References:**

1. I. A. Safo, M. Werheid, C. Dosche and M. Oezaslan, *Chem. Commun.*, 2019, 1, 3095.
2. J. Xu, T. Liu, J. Li, B. Li, Y. Liu, B. Zhang, D. Xiong, I. Amorim, W. Li and L. Liu, *Energy Environ. Sci.*, 2018, 11, 1819-1827.
3. D. H. Kweon, M. S. Okyay, S. Kim, J. Jeon, H. Noh, N. Park, J. Mahmood and J. Baek, *Nat. Commun.*, 2020, 11.
4. J. Mahmood, F. Li, S. Jung, M. S. Okyay, I. Ahmad, S. Kim, N. Park, H. Y. Jeong and J. Baek, *Nat. Nanotechnol.*, 2017, 12, 441-446.
5. T. Liu, B. Feng, X. Wu, Y. Niu, W. Hu and C. M. Li, *ACS Appl. Energy Mater.*, 2018, 1, 3143-3150.
6. J. Yu, Y. Guo, S. She, S. Miao, M. Ni, W. Zhou, M. Liu and Z. Shao, *Adv. Mater.*, 2018, 30, 1800047.
7. Q. Yao, B. Huang, N. Zhang, M. Sun, Q. Shao and X. Huang, *Angew. Chem., Int. Ed.*, 2019, 58, 13983-13988.
8. J. Yang, B. Chen, X. Liu, W. Liu, Z. Li, J. Dong, W. Chen, W. Yan, T. Yao, X. Duan, Y. Wu and Y. Li, *Angew. Chem., Int. Ed.*, 2018, 57, 9495-9500.
9. Q. Song, X. Qiao, L. Liu, Z. Xue, C. Huang and T. Wang, *Chem. Commun.*, 2019, 55, 965-968.
10. B. Lu, L. Guo, F. Wu, Y. Peng, J. E. Lu, T. J. Smart, N. Wang, Y. Z. Finrock, D. Morris, P. Zhang, N. Li, P. Gao, Y. Ping and S. Chen, *Nat. Commun.*, 2019, 10.
11. P. Li, X. Duan, S. Wang, L. Zheng, Y. Li, H. Duan, Y. Kuang and X. Sun, *Small*, 2019, 15, 1904043.
12. Y. Xu, Y. Li, S. Yin, H. Yu, H. Xue, X. Li, H. Wang and L. Wang, *Nanotechnology*, 2018, 29, 225403.
13. Z. Li, J. Fu, Y. Feng, C. Dong, H. Liu and X. Du, *Nat. Catal.*, 2019, 2, 1107-1114.
14. Z. Chen, J. Lu, Y. Ai, Y. Ji, T. Adschiri and L. Wan, *ACS Appl. Mater. Inter.*, 2016, 8, 35132-35137.
15. Z. Pu, I. S. Amiinu, Z. Kou, W. Li and S. Mu, *Angew. Chem., Int. Ed.*, 2017, 56, 11559-11564.
16. E. Demir, S. Akbayrak, A. M. Önal and S. Özkar, *ACS Appl. Mater. Interfaces*, 2018, 10, 6299-6308.
17. K. Rui, G. Zhao, M. Lao, P. Cui, X. Zheng, X. Zheng, J. Zhu, W. Huang, S. X. Dou and W. Sun, *Nano Lett.*, 2019, 19, 8447-8453.
18. Q. Chang, J. Ma, Y. Zhu, Z. Li, D. Xu, X. Duan, W. Peng, Y. Li, G. Zhang, F. Zhang and X. Fan, *ACS Sustain. Chem. Eng.*, 2018, 6, 6388-6394.
19. H. Song, M. Wu, Z. Tang, J. S. Tse, B. Yang and S. Lu, *Angew. Chem., Int. Ed.*, 2021, 60, 7234-7244.
20. T. Feng, G. Yu, S. Tao, S. Zhu, R. Ku, R. Zhang, Q. Zeng, M. Yang, Y. Chen, W. Chen, W. Chen and B. Yang,

J. Mater. Chem. A, 2020, 8, 9638-9645.

21. R. Ye, Y. Liu, Z. Peng, T. Wang, A. S. Jalilov, B. I. Yakobson, S. Wei and J. M. Tour, ACS Appl. Mater. Interfaces, 2017, 9, 3785-3791.
22. P. Jiang, Y. Yang, R. Shi, G. Xia, J. Chen, J. Su and Q. Chen, J. Mater. Chem. A, 2017, 5, 5475-5485.
23. J. Zhu, S. Li, M. Xiao, X. Zhao, G. Li, Z. Bai, M. Li, Y. Hu, R. Feng, W. Liu, R. Gao, D. Su, A. Yu and Z. Chen, Nano Energy, 2020, 77, 105212.
24. Y. Li, F. Chu, Y. Liu, Y. Kong, Y. Tao, Y. Li and Y. Qin, Chem. Commun., 2018, 54, 13076-13079.
25. T. Qiu, Z. Liang, W. Guo, S. Gao, C. Qu, H. Tabassum, H. Zhang, B. Zhu, R. Zou and Y. Shao-Horn, Nano Energy, 2019, 58, 1-10.
26. B. Yang, J. Xu, D. Bin, J. Wang, J. Zhao, Y. Liu, B. Li, X. Fang, Y. Liu, L. Qiao, L. Liu and B. Liu, Appl. Catal. B, 2021, 283, 119583.
27. X. Meng, C. Ma, L. Jiang, R. Si, X. Meng, Y. Tu, L. Yu, X. Bao and D. Deng, Angew. Chem., Int. Ed., 2020, 59, 10502-10507.
28. U. Joshi, S. Malkhandi, Y. Ren, T. L. Tan, S. Y. Chiam and B. S. Yeo, ACS Appl. Mater. Interfaces, 2018, 10, 6354-6360.
29. S. Drouet, J. Creus, V. Collière, C. Amiens, J. García-Antón, X. Sala and K. Philippot, Chem. Commun., 2017, 53, 11713-11716.
30. T. Bhowmik, M. K. Kundu and S. Barman, ACS Appl. Mater. Interfaces, 2016, 8, 28678-28688.
31. B. Guo, X. Zhang, J. Xie, Y. Shan, R. Fan, W. Yu, M. Li, D. Liu, Y. Chai and B. Dong, Int. J. Hydrog. Energy, 2021, 46, 7964-7973.
32. J. Huang and Y. Wu, ACS Sustain. Chem. Eng., 2018, 6, 8285-8290.
33. Z. Zhao, H. Wu and C. Li, Energy, 2021, 218, 119520.
34. K. Vasu, O. E. Meiron, A. N. Enyashin, R. Bar-Ziv and M. Bar-Sadan, The J. Phys. Chem. C, 2019, 123, 1987-1994.
35. W. Deng, Y. Li, F. Wang, Q. Ma and S. Min, Electrocatalysis, 2021, 12, 340-349.
36. L. Zhu, Q. Cai, F. Liao, M. Sheng, B. Wu and M. Shao, Electrochem commun, 2015, 52, 29-33.
37. B.K.Barman, D.Das and K. K.Nanda, Sustain. Energy Fuels, 2017, 1, 1028-1033
38. G. Liu, W. Zhou, B. Chen, Q. Zhang, X. Cui, B. Li, Z. Lai, Y. Chen, Z. Zhang, L. Gu and H. Zhang, Nano Energy, 2019, 66, 104173.
39. J. Su, Y. Yang, G. Xia, J. Chen, P. Jiang and Q. Chen, Nat. Commun., 2017, 8.
40. P. Jiang, Y. Yang, R. Shi, G. Xia, J. Chen, J. Su and Q. Chen, J. Mater. Chem. A, 2017, 5, 5475-5485.
41. X. Liu, Y. Guo, W. Zhan and T. Jin, Catalysts, 2019, 9, 240.
42. Y. Li, F. Chu, Y. Liu, Y. Kong, Y. Tao, Y. Li and Y. Qin, Chem. Commun., 2018, 54, 13076-13079.
43. J. Ding, Q. Shao, Y. Feng and X. Huang, Nano Energy, 2018, 47, 1-7.
44. Q. He, D. Tian, H. Jiang, D. Cao, S. Wei, D. Liu, P. Song, Y. Lin and L. Song, Adv. Mater., 2020, 32, 1906972.
45. Q. Chen, K. Wang, J. Qin, S. Wang, W. Wei, J. Wang, Q. Shen, P. Qu and D. Liu, RSC Adv., 2019, 9, 13486-13493.
46. T. Liu, B. Feng, X. Wu, Y. Niu, W. Hu and C. M. Li, ACS Appl. Energy Mater., 2018, 1, 3143-3150.
47. I. S. Kwon, T. T. Debela, I. H. Kwak, Y. C. Park, J. Seo, J. Y. Shim, S. J. Yoo, J. G. Kim, J. Park and H. S. Kang, Small, 2020, 16, 2000081.
48. Q. He, D. Tian, H. Jiang, D. Cao, S. Wei, D. Liu, P. Song, Y. Lin and L. Song, Adv. Mater, 2020, 32, 1906972.
49. J. Guo, D. Yan, K. Qiu, C. Mu, D. Jiao, J. Mao, H. Wang and T. Ling, J. Energy Chem., 2019, 37, 143-147.
50. X. Que, T. Lin, S. Li, X. Chen, C. Hu, Y. Wang, M. Shi, J. Peng, J. Li, J. Ma and M. Zhai, Appl. Surf. Sci., 2021, 541, 148345.
51. M. K. Kundu, R. Mishra, T. Bhowmik and S. Barman, J. Mater. Chem. A, 2018, 6, 23531-23541.
52. X. Meng, C. Ma, L. Jiang, R. Si, X. Meng, Y. Tu, L. Yu, X. Bao and D. Deng, Angew. Chem., Int. Ed., 2020,

59, 10502-10507.

53. J. Zhang, X. Xu, L. Yang, D. Cheng and D. Cao, *Small Methods*, 2019, 3, 1900653.

54. C. Liu, F. Wang, D. Jia, J. Zhang, J. Zhang, Q. Hao, J. Zhang, Y. Li and H. Liu, *Nanoscale*, 2020, 12, 19333-19339.

55. X. Liu, F. Liu, J. Yu, G. Xiong, L. Zhao, Y. Sang, S. Zuo, J. Zhang, H. Liu and W. Zhou, *Adv. Sci.*, 2020, 7, 2001526.

56. X. Liang and Y. Li, *J. Porous Mater.*, 2020, 27, 1213-1218.
